# Supplementary material for: Galactosylated Polymer/Gold Nanorods Nanocomposites for Sustained and Pulsed Chemo-Photothermal Treatments of Hepatocarcinoma
Source: MDPI journal article supplement (doi:10.3390/pharmaceutics14112503), 2022-11-18
Supplement: s1 [file pharmaceutics-2012570-supplementary.pdf › pharmaceutics-2012570-supplementary.pdf]

# Supporting information

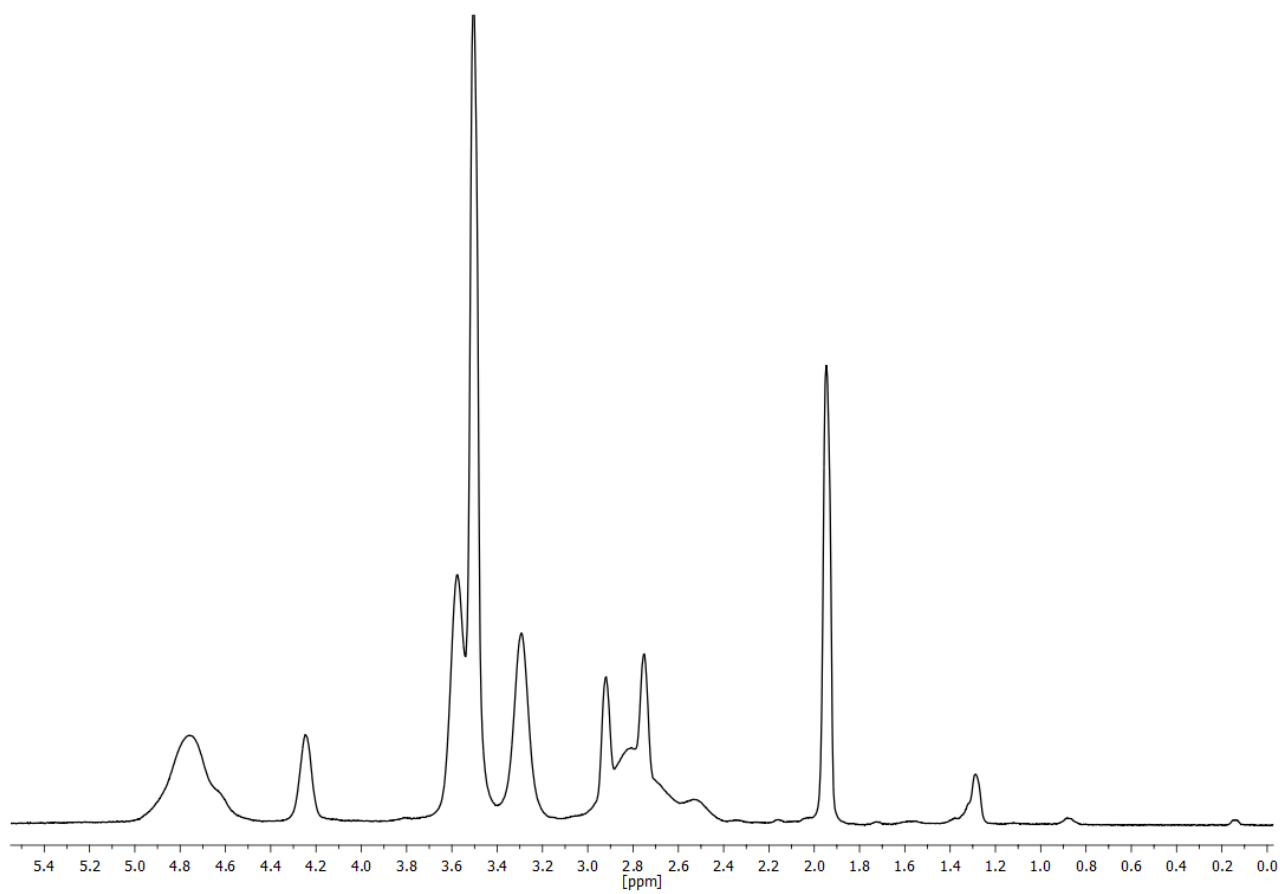

Figure S1.  $^1\text{H}$ -NMR spectrum of PHEA-g-BIB graft copolymer ( $\text{DMF-d}_7$ )

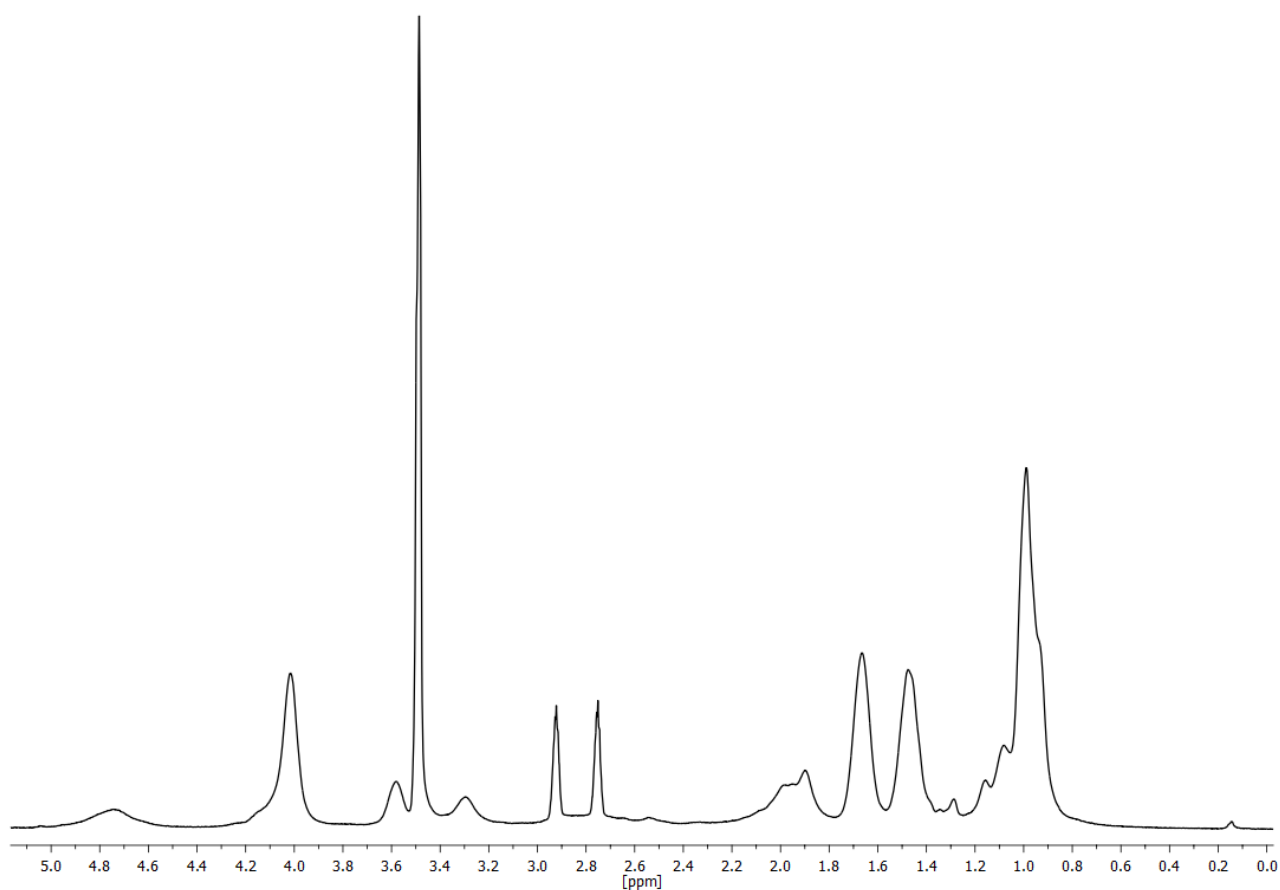

Figure S2.  $^1\text{H}$ -NMR spectrum of PHEA-g-BIB-pButMA graft copolymer ( $\text{DMF-d}_7$ )

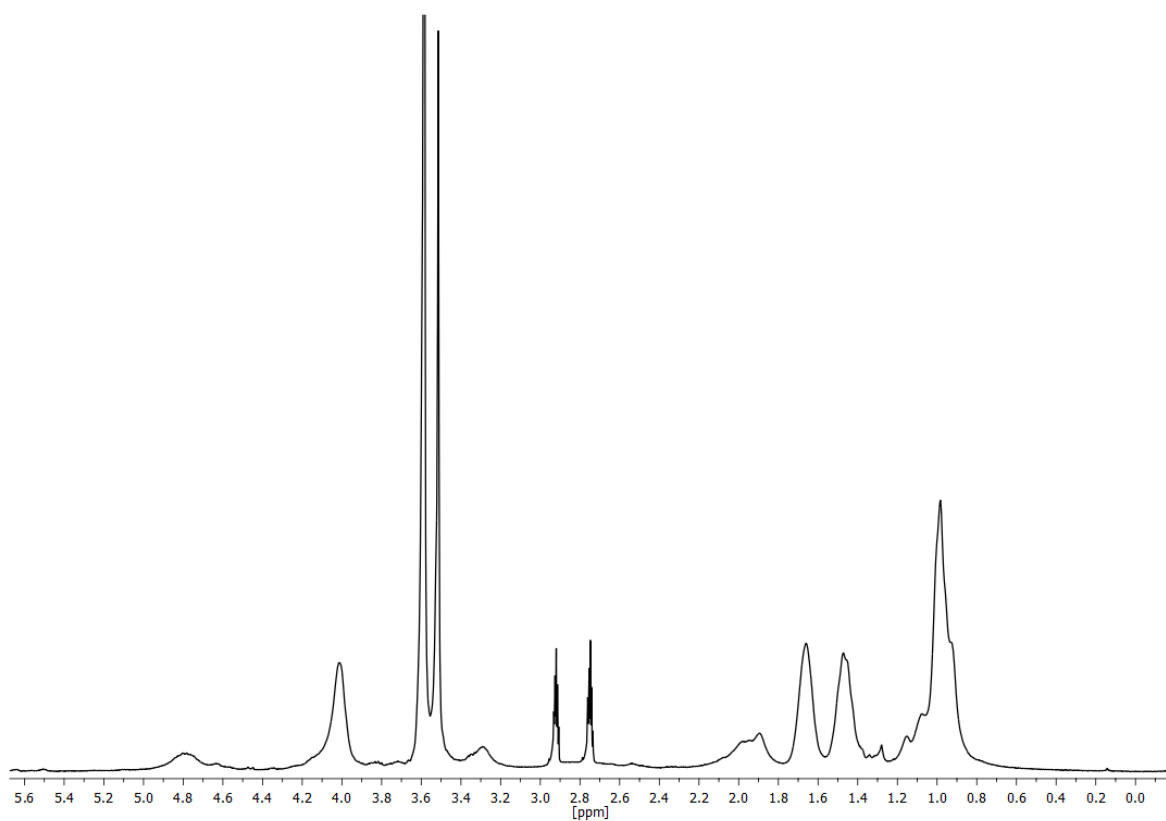

Figure S3.  $^1\text{H}$ -NMR spectrum of PHEA-g-BIB-pButMA-g-PEG-GAL graft copolymer ( $\text{DMF-d}_7$ )

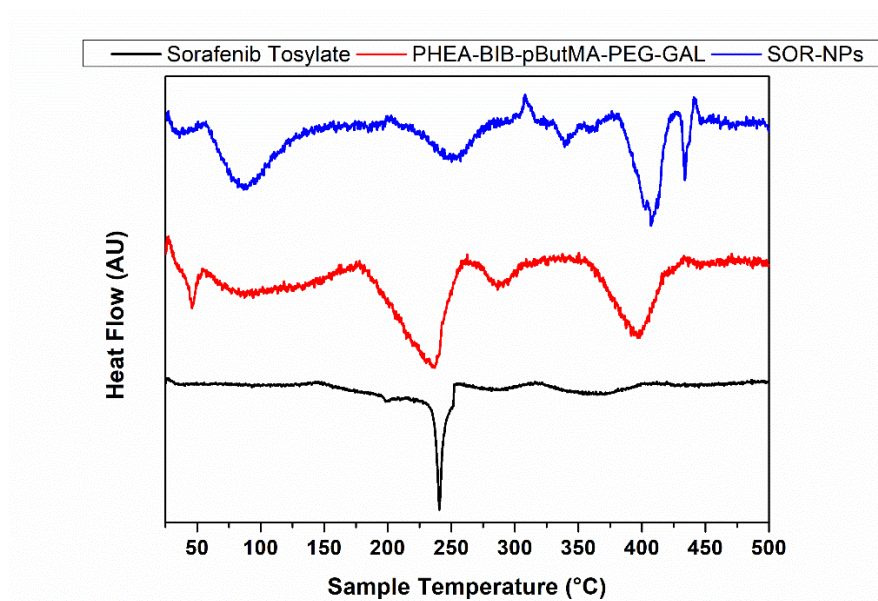

Figure S4. Differential Scanning Calorimetry of sorafenib tosylate (black), PHEA-g-BIB-pButMA-g-PEG-GAL (red), and SOR-NPs (blue)

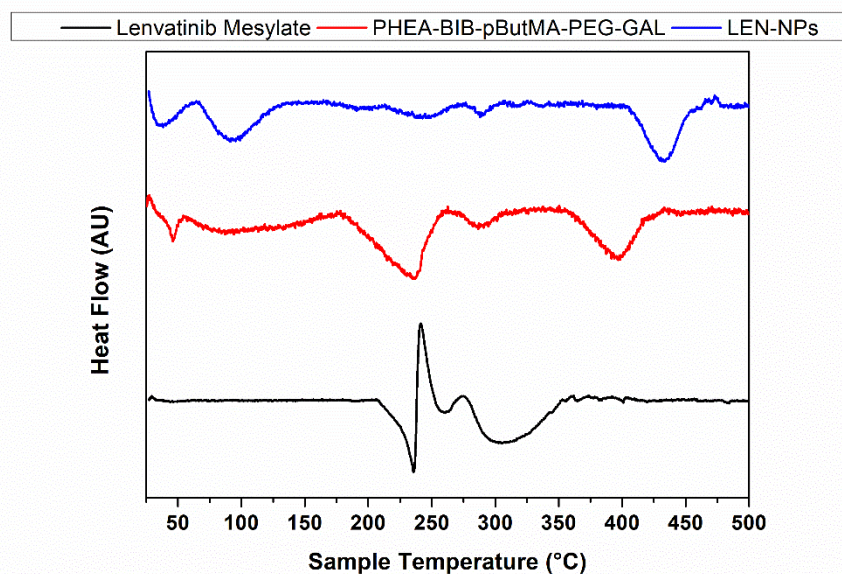

Figure S5. Differential Scanning Calorimetry of lenvatinib mesylate (black), PHEA-g-BIB-pButMA-g-PEG-GAL (red), and LEN-NPs (blue)
